# Supplementary material for: Software engineering education in the era of conversational AI: current trends and future directions
Source: Frontiers journal article supplement (doi:10.3389/frai.2024.1436350), 2024-08-29
Supplement: Data_Sheet_1.pdf [file Data_Sheet_1.pdf]

Table 1 Grouping of author keywords

| Keyword group                           | Author keywords                                                                                                                                                                                                                                                                                                                                                                                                                                                                                                                                                                                                      |
|-----------------------------------------|----------------------------------------------------------------------------------------------------------------------------------------------------------------------------------------------------------------------------------------------------------------------------------------------------------------------------------------------------------------------------------------------------------------------------------------------------------------------------------------------------------------------------------------------------------------------------------------------------------------------|
| AI, ML, LLM                             | AI; gen AI; explainable AI; AI techniques; machine learning; feature extraction; NLP; neural networks; deep learning; LLM; LLM-assisted; language models; transformers; zero-shot learning; few-shot learning; fine-tuning; code-fluent large language models; foundation models; generative models; generative pre-training' pre-trained model; predictive model; recommender systems                                                                                                                                                                                                                               |
| AI code assistance                      | AI for code; clean code; code documentation; code efficiency optimization; code linting; code snippets; code translation; creative code; program generation; program intention inference; program synthesis; readability; refactoring; programming; programming concepts; programming misconceptions; code comprehension; code explanation; automated code review; code review; (automated) software engineering; automated test generation; automated code generation; code completion; code generation; code recommender systems; code writing; coding generation; completion engine; software engineering tooling |
| GPT*                                    | GPT, GPT-3, GPT-4, ChatGPT                                                                                                                                                                                                                                                                                                                                                                                                                                                                                                                                                                                           |
| Education and pedagogy                  | AI in education; CS education; K12 CS education; computer network education; curriculum; education; educational design; educational programs; educational technology; higher education; pedagogy; post-secondary; programming education; software education; teaching; engineering education; active learning; intelligent tutoring; interactive learning; learning assistance system; instructor perspectives; student engagement; assessment; academic integrity; open-ended questions; oral examinations; programming knowledge assessment                                                                        |
| Introductory & intermediate programming | Java; JavaScript; Python; XML; programming language; intermediate programming; object-oriented programming; data structures; algorithms; CS1; CS2; introductory programming; novice programming                                                                                                                                                                                                                                                                                                                                                                                                                      |
| HCI studies                             | HCI; surveys; usability; user; user-centered design; user study; wizard of Oz; classroom experience; conversational interaction; design; digital interaction; gui design; practitioners' survey; scenario-based design; software developer survey; task-oriented interactions                                                                                                                                                                                                                                                                                                                                        |
| Software testing                        | API testing; automated API testing; software testing; test automation; test generation; test migration; testing; testing tools; coverage testing; failure-inducing test cases; mobile app testing; bug detection and repair; computer bugs; program repair; repairing; automated program repair; compiler error messages; syntax errors; programming error messages                                                                                                                                                                                                                                                  |
| GitHub CoPilot                          | GitHub CoPilot                                                                                                                                                                                                                                                                                                                                                                                                                                                                                                                                                                                                       |
| AI-aided instruction                    | AI- generated exercises; exercise generation; automatic question generation; automated grading; automated feedback; feedback; question evaluation; question generation; resource generation; programming exercises; programming assignments                                                                                                                                                                                                                                                                                                                                                                          |
| Prompt engineering                      | prompt augmentation; prompt engineering; chain-of-thought prompting                                                                                                                                                                                                                                                                                                                                                                                                                                                                                                                                                  |
| Software requirements                   | software requirements; software requirements classification; software requirements elicitation; requirements engineering (RE); RE education; user stories; wide audience; creative requirements elicitation; elicitation interview script generation; functional requirements                                                                                                                                                                                                                                                                                                                                        |

---

|                            |                                                                                                                                                                                                                                                                                                                                                                                                                |
|----------------------------|----------------------------------------------------------------------------------------------------------------------------------------------------------------------------------------------------------------------------------------------------------------------------------------------------------------------------------------------------------------------------------------------------------------|
| Software & its engineering | software; software documentation; software architecture; software context; software evolution; software projects; software performance; software development; software development management; software development process; software development productivity; software process improvement; pair programming; Scrum; agile; retrospective; empirical evaluation; empirical/experimental software engineering |
| BERT & others              | BERT; Bard; alphacode; OpenAI Codex                                                                                                                                                                                                                                                                                                                                                                            |
| Human aspects and ethics   | Ethical AI; privacy; trustworthy AI; diversity; human aspects; human-centered AI; human values                                                                                                                                                                                                                                                                                                                 |
| Modeling                   | domain modeling; UML; model-driven engineering; modelling; software models                                                                                                                                                                                                                                                                                                                                     |
| Formal methods             | Formal methods; validation                                                                                                                                                                                                                                                                                                                                                                                     |
| Socio-technical aspects    | developer experience; community smells; socio technical analysis; social implications of technology; programming profession; cohort building; collaboration; collaborative learning; computer supported collaborative work; onboarding; newcomer                                                                                                                                                               |

Table 2 Distribution of papers from SE\_I category across the six phases of SDLC

| <b>Requirements Engineering</b>          |                                                                                                                                                                                                                                                                                                                                                                                                                                                                                                                                                                         |
|------------------------------------------|-------------------------------------------------------------------------------------------------------------------------------------------------------------------------------------------------------------------------------------------------------------------------------------------------------------------------------------------------------------------------------------------------------------------------------------------------------------------------------------------------------------------------------------------------------------------------|
| Ethics                                   | Ronanki (2023)                                                                                                                                                                                                                                                                                                                                                                                                                                                                                                                                                          |
| Goal-Oriented Modelling                  | Chen et al. (2023a)                                                                                                                                                                                                                                                                                                                                                                                                                                                                                                                                                     |
| Requirements Analysis And Classification | Rajender Kumar Surana et al. (2019); Jain et al. (2023); Arulmohan et al. (2023); Das et al. (2023)                                                                                                                                                                                                                                                                                                                                                                                                                                                                     |
| Requirements Elicitation                 | Rietz (2019); Rietz and Maedche (2019); Harntanto et al. (2022); Ronanki et al. (2023)                                                                                                                                                                                                                                                                                                                                                                                                                                                                                  |
| User Stories                             | Marczak-Czajka and Cleland-Huang (2023)                                                                                                                                                                                                                                                                                                                                                                                                                                                                                                                                 |
| <b>Software Development</b>              |                                                                                                                                                                                                                                                                                                                                                                                                                                                                                                                                                                         |
| Api Recommendations                      | Vazquez et al. (2023)                                                                                                                                                                                                                                                                                                                                                                                                                                                                                                                                                   |
| Code Completion                          | Sun et al. (2023); Li et al. (2023c)                                                                                                                                                                                                                                                                                                                                                                                                                                                                                                                                    |
| Code Transpilation                       | Zhang et al. (2023)                                                                                                                                                                                                                                                                                                                                                                                                                                                                                                                                                     |
| Code Understanding                       | Sharma et al. (2017); Bradley et al. (2018); Lin et al. (2020); Frazier et al. (2022)                                                                                                                                                                                                                                                                                                                                                                                                                                                                                   |
| Development Tools                        | Li and Wang (2023); Treude (2023); Acher et al. (2023); Phokela et al. (2023); Cabra-Acela et al. (2023); Vaithilingam et al. (2023)                                                                                                                                                                                                                                                                                                                                                                                                                                    |
| Digital Coworker                         | Sharma et al. (2019); Kuttal et al. (2021); De Vito et al. (2023a); Robe and Kuttal (2022)                                                                                                                                                                                                                                                                                                                                                                                                                                                                              |
| Digital Mentor                           | Dominic et al. (2020a,b)                                                                                                                                                                                                                                                                                                                                                                                                                                                                                                                                                |
| Human Aspects                            | Ghorbani et al. (2023); Zamfirescu-Pereira et al. (2023); ?                                                                                                                                                                                                                                                                                                                                                                                                                                                                                                             |
| Other                                    | Storey and Zagalsky (2016); Melo et al. (2023)                                                                                                                                                                                                                                                                                                                                                                                                                                                                                                                          |
| Pair Programming                         | Imai (2022)                                                                                                                                                                                                                                                                                                                                                                                                                                                                                                                                                             |
| Program Repair                           | Wood et al. (2018)                                                                                                                                                                                                                                                                                                                                                                                                                                                                                                                                                      |
| Program Synthesis                        | Barke et al. (2023); Moroz et al. (2022); Nguyen and Nadi (2022); Al Madi (2022); Vaithilingam et al. (2022); Bird et al. (2022); Yan et al. (2023); Purwoko et al. (2023); Moradi Dakhel et al. (2023); Feng et al. (2023); Jesse et al. (2023); Wang et al. (2023); Siddiq et al. (2023); Tang et al. (2023); Scoccia (2023); Ciniselli et al. (2023); Melo (2023); Bucaioni et al. (2024); Ziegler et al. (2024); Mastropaolo et al. (2023); Delile et al. (2023); Liu et al. (2024); Rodriguez-Cardenas et al. (2023); Ross et al. (2023); Yetistiren et al. (2022) |
| Software Process                         | Melo et al. (2020)                                                                                                                                                                                                                                                                                                                                                                                                                                                                                                                                                      |
| Explainability                           | Sun et al. (2022)                                                                                                                                                                                                                                                                                                                                                                                                                                                                                                                                                       |
| Dataset                                  | Robe et al. (2022)                                                                                                                                                                                                                                                                                                                                                                                                                                                                                                                                                      |
| <b>Software Quality Assurance</b>        |                                                                                                                                                                                                                                                                                                                                                                                                                                                                                                                                                                         |
| Code Efficiency                          | Pan and Lyu (2023)                                                                                                                                                                                                                                                                                                                                                                                                                                                                                                                                                      |
| Code Reviews And Documentation           | Tufano et al. (2024)                                                                                                                                                                                                                                                                                                                                                                                                                                                                                                                                                    |
| Load Testing                             | Okanović et al. (2020)                                                                                                                                                                                                                                                                                                                                                                                                                                                                                                                                                  |
| Program Repair                           | Prenner et al. (2022); Xia et al. (2023); Weng and Andrzejak (2023); Wei et al. (2023); Ribeiro et al. (2023); Jin et al. (2023a); Wu et al. (2023); Zhang et al. (2024)                                                                                                                                                                                                                                                                                                                                                                                                |

|                                |                                                                                                                                                         |
|--------------------------------|---------------------------------------------------------------------------------------------------------------------------------------------------------|
| Security And Reliability       | Tony et al. (2022); Jin et al. (2023b); Shi et al. (2023); Happe and Cito (2023)                                                                        |
| Testing Automation             | Dantas et al. (2023); Nguyen et al. (2023); Guilherme and Vincenzi (2023); Kang et al. (2023); Yu et al. (2023); Li et al. (2023b); Feldt et al. (2023) |
| Vulnerabilities Detection      | Ozturk et al. (2023); Li et al. (2023a); Asare et al. (2023)                                                                                            |
| Dataset                        | Tihanyi et al. (2023)                                                                                                                                   |
| <b>Software Design</b>         |                                                                                                                                                         |
| Gui                            | Brie et al. (2023)                                                                                                                                      |
| Model-Driven Engineering       | Qasse et al. (2023)                                                                                                                                     |
| Modelling                      | Chen et al. (2023b); Cámara et al. (2023)                                                                                                               |
| System Architecture            | Ahmad et al. (2023)                                                                                                                                     |
| Use Cases                      | De Vito et al. (2023b)                                                                                                                                  |
| <b>Software Maintenance</b>    |                                                                                                                                                         |
| Code Reviews And Documentation | Su et al. (2023)                                                                                                                                        |
| Code Summarization             | Khan and Uddin (2022)                                                                                                                                   |
| Log Parsing                    | Le and Zhang (2023)                                                                                                                                     |
| Q And A Bots                   | Pinto et al. (2023)                                                                                                                                     |
| Traceability                   | Rodriguez et al. (2023)                                                                                                                                 |
| <b>Software Management</b>     |                                                                                                                                                         |
| Community Smell                | Voria et al. (2022)                                                                                                                                     |
| Effort Estimation              | Hefny et al. (2021)                                                                                                                                     |
| Agile Project Management       | Dam et al. (2019)                                                                                                                                       |
| Expert Recommendation          | Cerezo et al. (2019)                                                                                                                                    |
| Software Process Improvement   | Matthies et al. (2019)                                                                                                                                  |
| <b>Survey</b>                  |                                                                                                                                                         |
| Mapping Study                  | Santhanam et al. (2022)                                                                                                                                 |
| Other                          | Liang et al. (2024); Belzner et al. (2024); Fan et al. (2023)                                                                                           |
| Systematic Review              | Del Carpio and Angarita (2023)                                                                                                                          |

Table 3 Themes, Codes, and Example Sentences from CS\_HE abstracts

| Themes                               | Subthemes / Codes                                           | Examples from Abstracts                                                                                                                                                                                                                                                                                                                                                                                                                                                                                                                                               |
|--------------------------------------|-------------------------------------------------------------|-----------------------------------------------------------------------------------------------------------------------------------------------------------------------------------------------------------------------------------------------------------------------------------------------------------------------------------------------------------------------------------------------------------------------------------------------------------------------------------------------------------------------------------------------------------------------|
| Challenges in Conventional Education | Communicating about code                                    | <p>"However, communicating about code can be difficult — particularly in asynchronous settings where an instructor authors an explanation meant to be read and understood by a student later on." (Oney et al., 2018)</p> <p>"However, developing the expertise to comprehend and explain code accurately and succinctly is a challenge for many students." (Leinonen et al., 2023)</p>                                                                                                                                                                               |
|                                      | Addressing diverse needs                                    | <p>"In traditional programming education, addressing diverse student needs and providing effective and scalable learning experiences is challenging." (Shaka et al., 2023)</p> <p>"Providing personalized assistance at scale is a long-standing challenge for computing educators" (Sheese et al., 2024)</p>                                                                                                                                                                                                                                                         |
|                                      | Scalability of creating practice opportunities and feedback | <p>"Students learn more from doing activities and practicing their skills on assessments, yet it can be challenging and time consuming to generate such practice opportunities." (Nguyen et al., 2022);</p> <p>"Programming is an essential cross-disciplinary skill, yet teaching it effectively in large classes can be challenging due to the need for close feedback loops." (Jell et al., 2023)</p>                                                                                                                                                              |
| Testing GenAI capabilities           | Work in a language other than English                       | <p>"we report our experience using GPT-3 to solve 6 real-world tasks used in an Object Oriented Programming course at a Portuguese University and written in Portuguese." (Cipriano and Alves, 2023)</p>                                                                                                                                                                                                                                                                                                                                                              |
|                                      | Solve programming examples and their variations             | <p>"We then explore how Codex handles subtle variations in problem wording" (Finnie-Ansley et al., 2022)</p> <p>"evaluating the performance of Copilot on a publicly available dataset of 166 programming problems" (Denny et al., 2023)</p> <p>"we conducted different coding-related experiments with ChatGPT, including code generation from problem descriptions, pseudocode generation of algorithms from texts, and code correction" (Rahman and Watanobe, 2023)</p>                                                                                            |
|                                      | Pass assessments or exams                                   | <p>"We evaluated the capability of generative pre-trained transformers (GPT), to pass assessments in introductory and intermediate Python programming courses at the postsecondary level." (Savelka et al., 2023)</p> <p>" exploring ChatGPT responses to existing assessment prompts from ten subjects across seven Australian universities" (Sasha Nikolic and Sandison, 2023)</p> <p>"we present results detailing how Codex performs on more advanced CS2 (data structures and algorithms) exam questions taken from past exams" (Finnie-Ansley et al., 2023)</p> |

|                              |                                   |                                                                                                                                                                                                                                                                                                                                                                                                                                                                   |
|------------------------------|-----------------------------------|-------------------------------------------------------------------------------------------------------------------------------------------------------------------------------------------------------------------------------------------------------------------------------------------------------------------------------------------------------------------------------------------------------------------------------------------------------------------|
|                              | Apply to other computing subjects | <p>"we present a pipeline for generating and evaluating questions from text-based learning materials in an introductory data science course" (Nguyen et al., 2022)</p> <p>"we research to what extent does using chatbots improve higher education students' essential knowledge of computer networks?" (Ahmed and Hasnine, 2023)</p>                                                                                                                             |
|                              | Help/tutor students               | <p>"how an LLM like ChatGPT responds to students seeking help with their introductory programming tasks"(Kiesler et al., 2023)</p> <p>we compare chatGPT and mentor responses in the process of learning a programming language (Moon et al., 2023)</p>                                                                                                                                                                                                           |
|                              | Prepare course materials/grade    | <p>"we explore the capabilities of an LLM - OpenAI's GPT-3 model to provide feedback for student written code." (Balse et al., 2023)</p> <p>"we developed an LLM-powered (GPT-4) system for generation of MCQs from high-level course context and module-level LOs" (Doughty et al., 2024)</p> <p>"we investigate the use of AI-generated exercises for beginner and intermediate programming courses in higher education using ChatGPT" (Speth et al., 2023)</p> |
| GenAI-based innovative tools | Track and summarise code edits    | "it tracks and summarizes code edits in-line with messages, allowing instructors to create explanations in stages" (Oney et al., 2018)                                                                                                                                                                                                                                                                                                                            |
|                              | Detect misconception              | "a novel platform centered on addressing misconceptions" (Jell et al., 2023)                                                                                                                                                                                                                                                                                                                                                                                      |
|                              | Personalised and timely feedback  | <p>"AIPTs that offer personalised feedback through adaptive learning, accommodating diverse student backgrounds and proficiency levels" (Shaka et al., 2023)</p> <p>prompt practices that lead to effective next-step hints and use these insights to build our StAP-tutor (Roest et al., 2024)</p>                                                                                                                                                               |
|                              | Guided explanations / assistance  | <p>"chat.codes, a new tool for creating guided explanations about code" (Oney et al., 2018)</p> <p>" a system to assist programming language learning using chatGPT"(Moon et al., 2023)</p> <p>"KOGI, a learning support system that integrates ChatGPT" (Kuramitsu et al., 2023)</p> <p>"innovative LLM-powered tool that provides on-demand programming assistance" (Sheese et al., 2024)</p>                                                                   |
|                              | Human-like tutoring               | "level-specific feedback to emulate human-like tutoring (Jell et al., 2023)                                                                                                                                                                                                                                                                                                                                                                                       |
|                              | Interactive worked examples       | "WorkedGen', which uses an LLM to generate interactive worked examples" (Jury et al., 2024)                                                                                                                                                                                                                                                                                                                                                                       |
|                              | Prompt problems tool              | "a new web-based tool called Promptly which hosts a repository of Prompt Problems and supports the automated evaluation of prompt-generated code" (Denny et al., 2024)                                                                                                                                                                                                                                                                                            |

|                                   |                                                     |                                                                                                                                                                                                                                                                                                                                                                                                                                                                                                                                                                                                                             |
|-----------------------------------|-----------------------------------------------------|-----------------------------------------------------------------------------------------------------------------------------------------------------------------------------------------------------------------------------------------------------------------------------------------------------------------------------------------------------------------------------------------------------------------------------------------------------------------------------------------------------------------------------------------------------------------------------------------------------------------------------|
| Good performance with limitations | Positive user experience                            | <p>"beneficial for both instructors and students" (Oney et al., 2018)</p> <p>"students using ChatGPT had an advantage in terms of earned scores" (Qureshi, 2023)</p> <p>"using Codex significantly increased code-authoring performance" (Kazemitabaar et al., 2023)</p>                                                                                                                                                                                                                                                                                                                                                    |
|                                   | GenAI outperforms students; has high performance    | <p>"Codex outscores most students" (Finnie-Ansley et al., 2022)</p> <p>"the majority of the automatically generated content is both novel and sensible, and in some cases ready to use as is" (Sarsa et al., 2022)</p> <p>"with little modification to the input prompts, ChatGPT could generate passable responses to many of the assessments" (Sasha Nikolic and Sandison, 2023)</p> <p>"[CoPilot] successfully solves around half of these problems on its very first attempt, and that it solves 60% of the remaining problems using only natural language changes to the problem description" (Denny et al., 2023)</p> |
|                                   | Limitations in handling complex input and reasoning | <p>"poor handling of exercises requiring complex chains of reasoning step" (Savelka et al., 2023)</p> <p>"ChatGPT struggles with coding exercises containing non-textual descriptions or class files, leading to invalid solutions" (Ouh et al., 2023)</p> <p>"[GPT3] tends not to give the best solution in terms of object oriented design" (Cipriano and Alves, 2023)</p>                                                                                                                                                                                                                                                |
| Mixed instructional implications  | Positives                                           | <p>"ChatGPT, as an AI-based tool, provides various advantages, such as heightened student involvement, cooperation, accessibility, and availability." (Qureshi, 2023)</p> <p>"Educators can also use ChatGPT to provide personalized learning experiences, including immediate feedback and context-based questions." (Morsy et al., 2023)</p>                                                                                                                                                                                                                                                                              |
|                                   | Negatives                                           | <p>"there remains a need for some oversight to ensure the quality of the generated content before it is delivered to students" (Sarsa et al., 2022)</p> <p>"it has raised many questions about the authenticity of assessment and challenges in detecting plagiarism" (Sasha Nikolic and Sandison, 2023)</p> <p>"we expect students to use and abuse this tool in their academic work" (Cipriano and Alves, 2023)</p> <p>"however, over-reliance might negatively impact learning and retention" (Kazemitabaar et al., 2023)</p>                                                                                            |

---

|  |        |                                                                                                                                                                                                                                                                                                                                                                                                                                                                                             |
|--|--------|---------------------------------------------------------------------------------------------------------------------------------------------------------------------------------------------------------------------------------------------------------------------------------------------------------------------------------------------------------------------------------------------------------------------------------------------------------------------------------------------|
|  | Future | <p>” research-based course-specific standard chatbots are required to teach” (Ahmed and Hasnine, 2023)</p> <p>”this news should not, however, suggest that students not learn how to program but instead that instructors rethink how they teach programming.” (Jacques, 2023)</p> <p>”Findings suggest that students are likely to use ChatGPT, but there is a need for specific guidelines, more classroom assessments, and mandatory reporting of ChatGPT use” (Rajabi et al., 2023)</p> |
|--|--------|---------------------------------------------------------------------------------------------------------------------------------------------------------------------------------------------------------------------------------------------------------------------------------------------------------------------------------------------------------------------------------------------------------------------------------------------------------------------------------------------|
